# Supplementary material
Source: PubMed Central journal article supplement (PMC5867241)

## Supplemental Figure S1 — Cohort Characteristics and Outcomes by Year

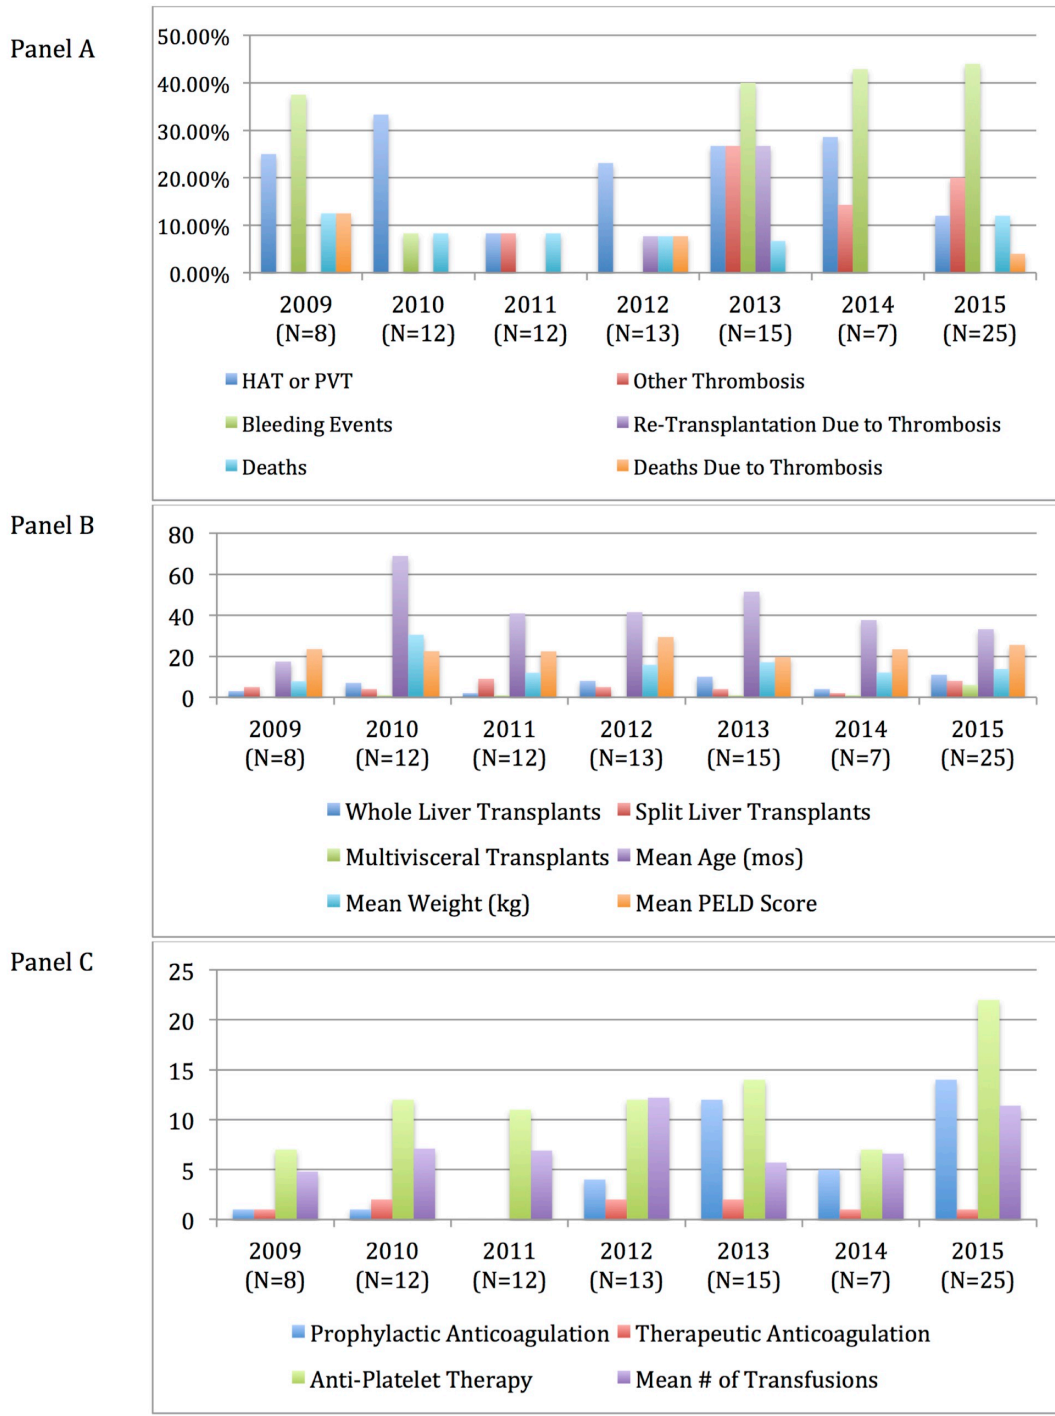

Supplement: NIHMS934857-supplement-Supp_FigS1.pdf [file NIHMS934857-supplement-Supp_FigS1.pdf]
